# Supplementary material for: An epidemiological appraisal of the association between heart rate variability and particulate air pollution: a meta-analysis
Source: HighWire-hosted journal article supplement (doi:10.1136/heartjnl-2011-301505), 2012-05-23
Supplement: heartjnl-2011-301505-s1.pdf [file heartjnl-2011-301505-s1.pdf]

| Reference                        | Participant characteristics | Response higher than 75% | Information about responders vs. non responders | Sample size higher than 400 persons | Repeated measures | Statistical methods |
|----------------------------------|-----------------------------|--------------------------|-------------------------------------------------|-------------------------------------|-------------------|---------------------|
| Liao et al. 1999 [38]            | 1                           | 0                        | 0                                               | 0                                   | 1                 | 1                   |
| Pope et al. 1999 [14]            | 1                           | NA                       | NA                                              | 0                                   | 1                 | 1                   |
| Gold et al. 2000 [34]            | 1                           | 0                        | 0                                               | 0                                   | 1                 | 1                   |
| Brauer et al. 2001 [36]          | 1                           | 0                        | 0                                               | 0                                   | 1                 | 1                   |
| Magari et al.2001 [18]           | 1                           | UD                       | 0                                               | 0                                   | 1                 | 1                   |
| Holguin et al. 2003 [35]         | 1                           | 1                        | 0                                               | 0                                   | 1                 | 1                   |
| Liao et al. 2004 [41]            | 1                           | 0                        | 0                                               | 1                                   | 0                 | 1                   |
| Pope et al. 2004 [39]            | 1                           | UD                       | 0                                               | 0                                   | 1                 | 1                   |
| Riediker et al. 2004 [19]        | 1                           | UD                       | 0                                               | 0                                   | 1                 | 1                   |
| Park et al. 2004 [23]            | 1                           | NA                       | NA                                              | 1                                   | 0                 | 1                   |
| Schwartz et al. 2005 [31]        | 1                           | UD                       | 0                                               | 0                                   | 1                 | 1                   |
| Sullivan et al. 2005 [33]        | 1                           | UD                       | 0                                               | 0                                   | 1                 | 1                   |
| Lipsett et al. 2006 [6]          | 1                           | UD                       | 0                                               | 0                                   | 1                 | 1                   |
| Luttmann-Gibson et al.2006 [32]  | 1                           | 0                        | 0                                               | 0                                   | 1                 | 1                   |
| Timonen et al. 2006 [30]         | 1                           | NA                       | NA                                              | 0                                   | 1                 | 1                   |
| Vallejo et al. 2006 [21]         | 1                           | 1                        | 1                                               | 0                                   | 1                 | 1                   |
| Riojas-Rodriguez et al.2006 [22] | 1                           | UD                       | 0                                               | 0                                   | 1                 | 1                   |
| Chuang et al.2007 young [37]     | 1                           | 1                        | 0                                               | 0                                   | 1                 | 1                   |
| Chuang et al. 2007 elderly [26]  | 1                           | UD                       | 0                                               | 0                                   | 1                 | 1                   |
| Min et al.2008 [16]              | 1                           | UD                       | 0                                               | 1                                   | 1                 | 1                   |
| Folino et al.2009 [25]           | 1                           | 1                        | 0                                               | 0                                   | 1                 | 1                   |
| Whitsel et al.2009 [15]          | 1                           | UD                       | 0                                               | 1                                   | 1                 | 1                   |
| Zanobetti et al. 2009 [24]       | 1                           | UD                       | 0                                               | 0                                   | 1                 | 1                   |
| Park et al. 2010 [42]            | 1                           | 1                        | 0                                               | 1                                   | 0                 | 1                   |
| Schneider et al. 2010 [40]       | 1                           | UD                       | 0                                               | 0                                   | 1                 | 1                   |
| Suh et al. 2010 [27]             | 1                           | UD                       | 0                                               | 0                                   | 1                 | 1                   |
| Wu et al. 2010 [20]              | 1                           | UD                       | 0                                               | 0                                   | 1                 | 1                   |
| He et al. 2011 [28]              | 1                           | 1                        | UD                                              | 0                                   | 1                 | 1                   |
| Jia et al. 2011 [29]             | 1                           | UD                       | 0                                               | 0                                   | 1                 | 1                   |

| Reference                         | Personal particulate matter assessment | Local particulate matter assessment | Correction for meteorological variables (temperature, relative humidity) | Correction for individual variables (Age, heart rate) | Overall quality score |
|-----------------------------------|----------------------------------------|-------------------------------------|--------------------------------------------------------------------------|-------------------------------------------------------|-----------------------|
| Liao et al. 1999 [38]             | 0                                      | 1                                   | 0                                                                        | 0                                                     | 4                     |
| Pope et al. 1999 [14]             | 0                                      | 0                                   | 0                                                                        | 0                                                     | 3                     |
| Gold et al. 2000 [34]             | 0                                      | 0                                   | 1                                                                        | 0                                                     | 4                     |
| Brauer et al. 2001 [36]           | 0                                      | 0                                   | 0                                                                        | 0                                                     | 3                     |
| Magari et al. 2001 [18]           | 1                                      | 0                                   | 0                                                                        | 1                                                     | 5                     |
| Holguin et al. 2003 [35]          | 0                                      | 1                                   | 0                                                                        | 1                                                     | 6                     |
| Liao et al. 2004 [41]             | 0                                      | 0                                   | 1                                                                        | 1                                                     | 5                     |
| Pope et al. 2004 [39]             | 0                                      | 0                                   | 1                                                                        | 0                                                     | 4                     |
| Riediker et al. 2004 [19]         | 0                                      | 1                                   | 0                                                                        | 0                                                     | 4                     |
| Park et al. 2004 [23]             | 0                                      | 0                                   | 1                                                                        | 0                                                     | 4                     |
| Schwartz et al.2005 [31]          | 0                                      | 0                                   | 1                                                                        | 1                                                     | 5                     |
| Sullivan et al. 2005 [33]         | 0                                      | 1                                   | 1                                                                        | 0                                                     | 5                     |
| Lipsett et al.2006 [6]            | 0                                      | 0                                   | 0                                                                        | 0                                                     | 3                     |
| Luttmann-Gibson et al.2006 [32]   | 0                                      | 0                                   | 1                                                                        | 0                                                     | 4                     |
| Timonen et al. 2006 [30]          | 0                                      | 0                                   | 1                                                                        | 0                                                     | 4                     |
| Vallejo et al. 2006 [21]          | 1                                      | 0                                   | 1                                                                        | 0                                                     | 7                     |
| Riojas-Rodriguez et al. 2006 [22] | 1                                      | 0                                   | 0                                                                        | 0                                                     | 4                     |
| Chuang et al. 2007 young [37]     | 0                                      | 1                                   | 1                                                                        | 0                                                     | 6                     |
| Chuang et al. 2007 elderly [26]   | 0                                      | 0                                   | 1                                                                        | 0                                                     | 4                     |
| Min et al. 2008 [16]              | 0                                      | 0                                   | 1                                                                        | 0                                                     | 5                     |
| Folino et al. 2009 [25]           | 1                                      | 0                                   | 1                                                                        | 0                                                     | 6                     |
| Whitsel et al. 2009 [15]          | 0                                      | 0                                   | 1                                                                        | 0                                                     | 5                     |
| Zanobetti et al. 2009 [24]        | 0                                      | 0                                   | 1                                                                        | 1                                                     | 5                     |
| Park et al. 2010 [42]             | 0                                      | 0                                   | 1                                                                        | 0                                                     | 5                     |
| Schneider et al. 2010 [40]        | 0                                      | 0                                   | 0                                                                        | 0                                                     | 3                     |
| Suh et al. 2010 [27]              | 1                                      | 0                                   | 1                                                                        | 0                                                     | 5                     |
| Wu et al. 2010 [20]               | 1                                      | 0                                   | 1                                                                        | 1                                                     | 6                     |
| He et al. 2011 [28]               | 1                                      | 0                                   | 1                                                                        | 0                                                     | 6                     |
| Jia et al. 2011 [29]              | 0                                      | 1                                   | 1                                                                        | 1                                                     | 6                     |
