# Supplementary material for: An epidemiological appraisal of the association between heart rate variability and particulate air pollution: a meta-analysis
Source: HighWire-hosted journal article supplement (doi:10.1136/heartjnl-2011-301505), 2012-05-23
Supplement: heartjnl-2011-301505-s2.pdf [file heartjnl-2011-301505-s2.pdf]

*Table : Change in heart rate variability (95% CI) associated with a 10 µg/m<sup>3</sup> increase in PM<sub>2.5</sub> after removing the most influential studies*

| HRV parameter | Inclusion of occupational studies |  | Largest combined effect estimate in % |  | Smallest combined effect estimate in % |                           |
|---------------|-----------------------------------|--|---------------------------------------|--|----------------------------------------|---------------------------|
|               |                                   |  | when excluding one study [Ref]        |  | excluding one study [Ref]              |                           |
| LF            | Yes                               |  | -2.01% (95%CI: -3.11% to -90%) [22]   |  | -1.23% (95%CI: -1.85% to -0.61%) [28]  |                           |
|               | No                                |  | -2.42% (95%CI: -3.72% to -1.13%) [22] |  | -1.51% (95%CI: -2.32% to -0.40%) [28]  |                           |
| HF            | Yes                               |  | -3.14% (95%CI: -4.84% to -1.43%) [22] |  | -1.96% (95%CI: -3.16% to -0.76%) [28]  |                           |
|               | No                                |  | -4.05% (95%CI: -6.29% to -1.81%) [22] |  | -2.49% (95%CI: -4.10% to -0.87%) [28]  |                           |
| SDNN          | Yes                               |  | -1.09% (95%CI: -1.54% to -0.63%) [18] |  | -0.1% (95%CI: -0.19% to -0.02%) [14]   |                           |
|               | No                                |  | -1.36% (95%CI: -1.94% to -0.78%) [25] |  | -1.11% (95%CI: -1.66% to -0.57%) [39]  |                           |
| rMSSD         | /                                 |  | -2.43% (95%CI: -3.5% to -1.36%) [14]  |  | -1.86% (95%CI: -2.96% to -0.76%) [39]  | <a href="#">ENREF_128</a> |
