# Supplementary figures and images for: An epidemiological appraisal of the association between heart rate variability and particulate air pollution: a meta-analysis
Source: HighWire-hosted journal article supplement (doi:10.1136/heartjnl-2011-301505), 2012-05-23

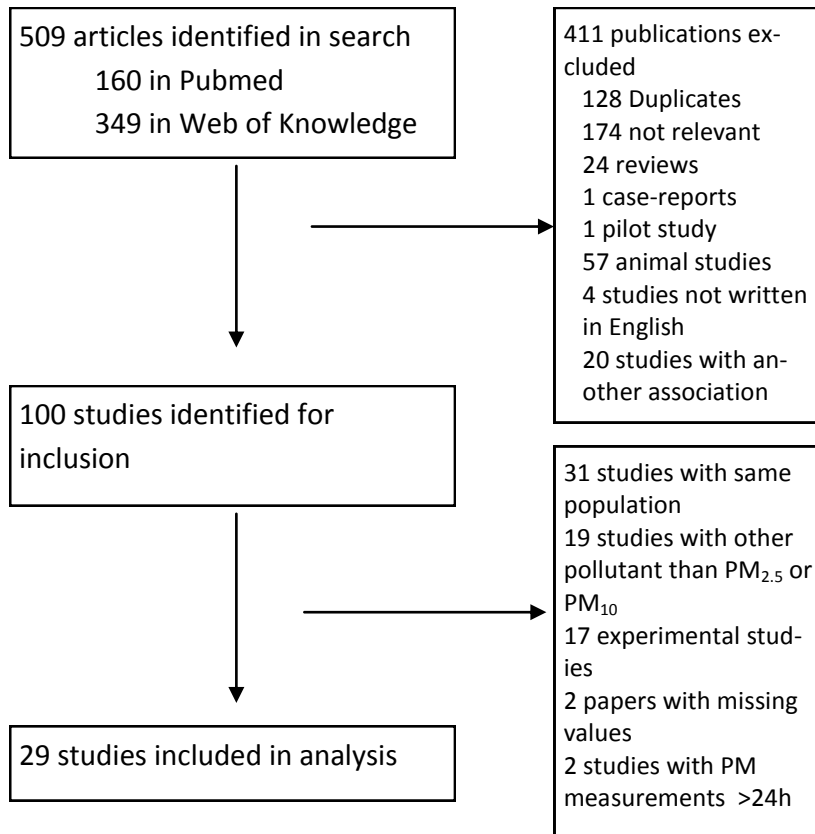

Supplement: heartjnl-2011-301505-s3.pdf [file heartjnl-2011-301505-s3.pdf]

**LF**

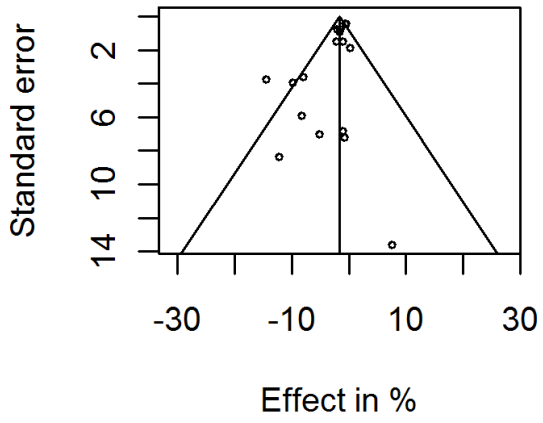

**HF**

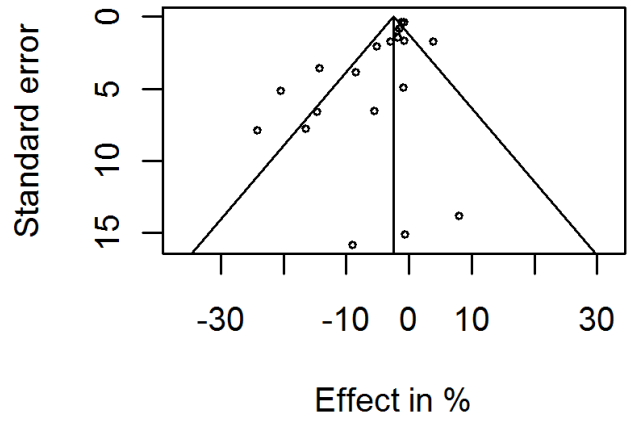

**SDNN**

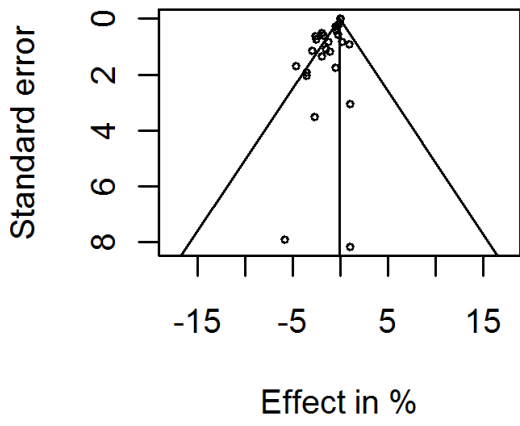

**rMSSD**

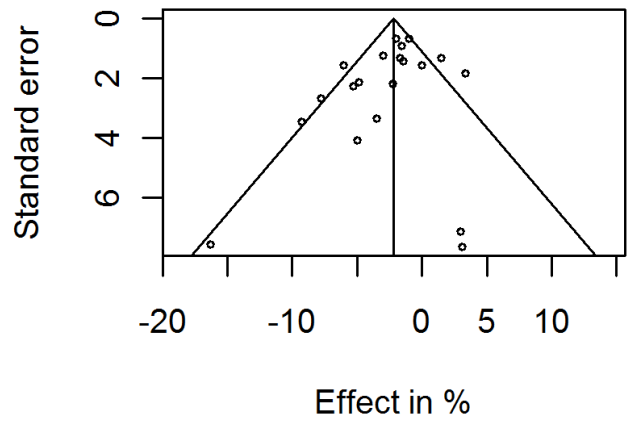

Supplement: heartjnl-2011-301505-s4.pdf [file heartjnl-2011-301505-s4.pdf]
